# Supplementary material
Source: JCI journal article supplement (doi:10.1172/jci174220)

# S. Figure 1

## A

SNU1079

ARV825(0 nM)

ARV825(40 nM)

RAPA  
(0 nM)

RAPA  
(10 nM)

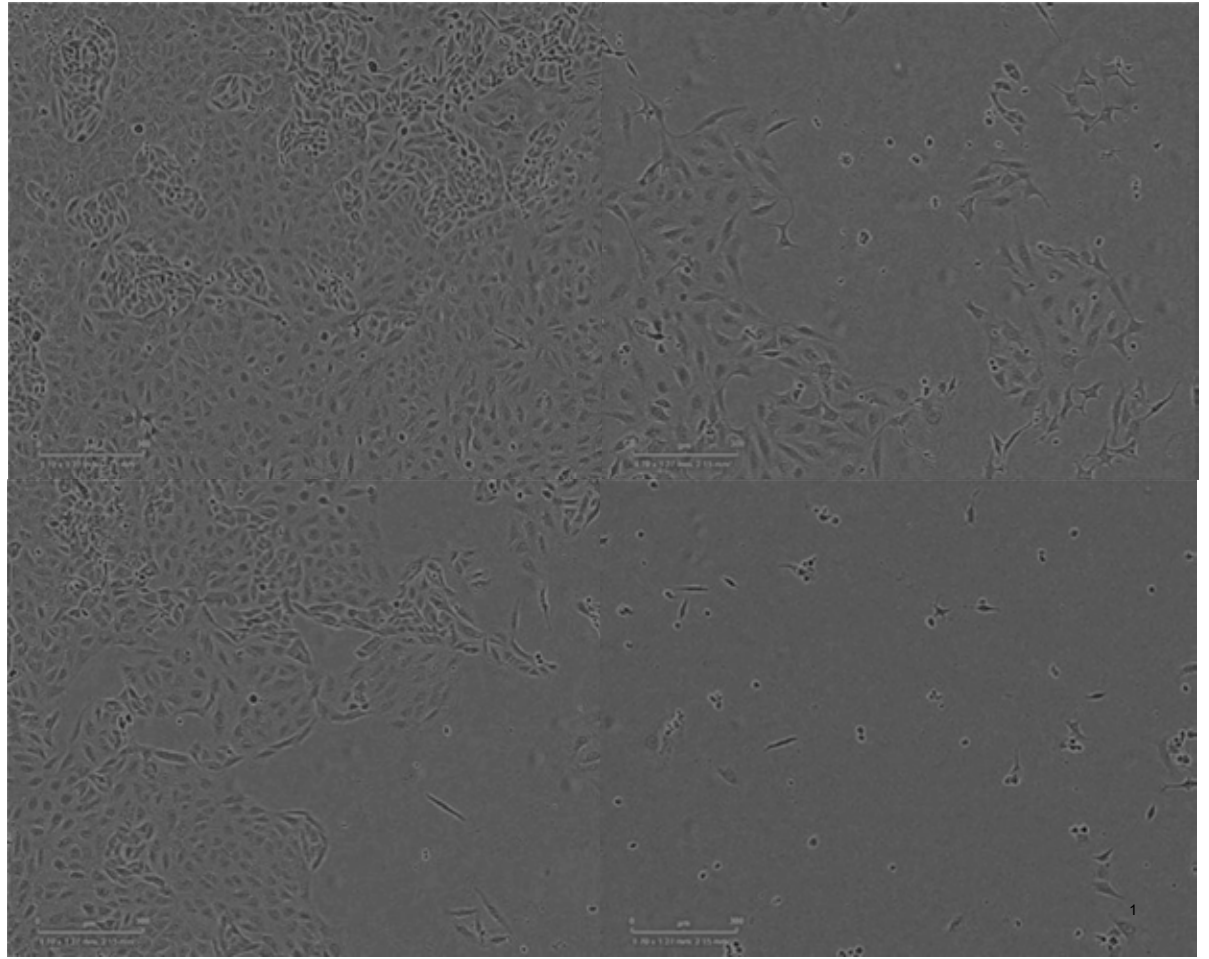

## B

SNU1079

ARV825(0 nM)

ARV825(40 nM)

AZD8055  
(0 nM)

AZD8055  
(50 nM)

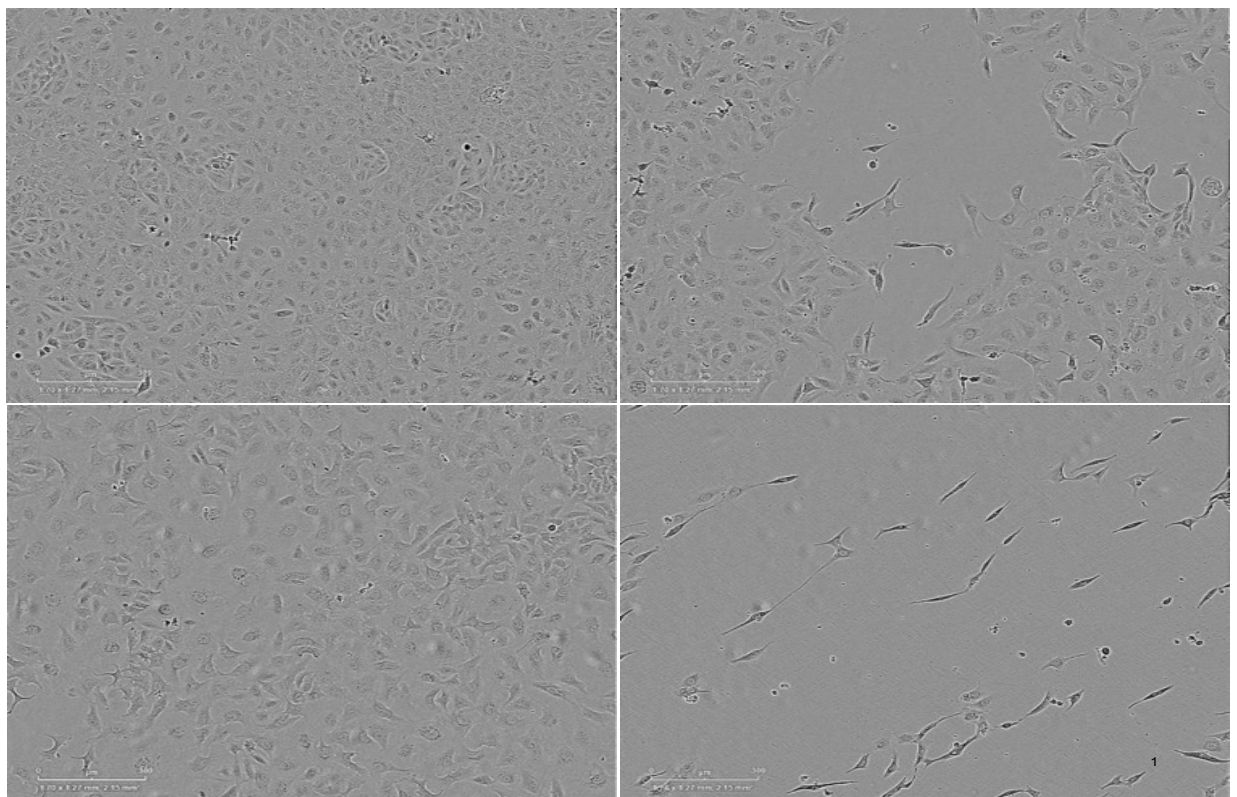

# S Figure 2

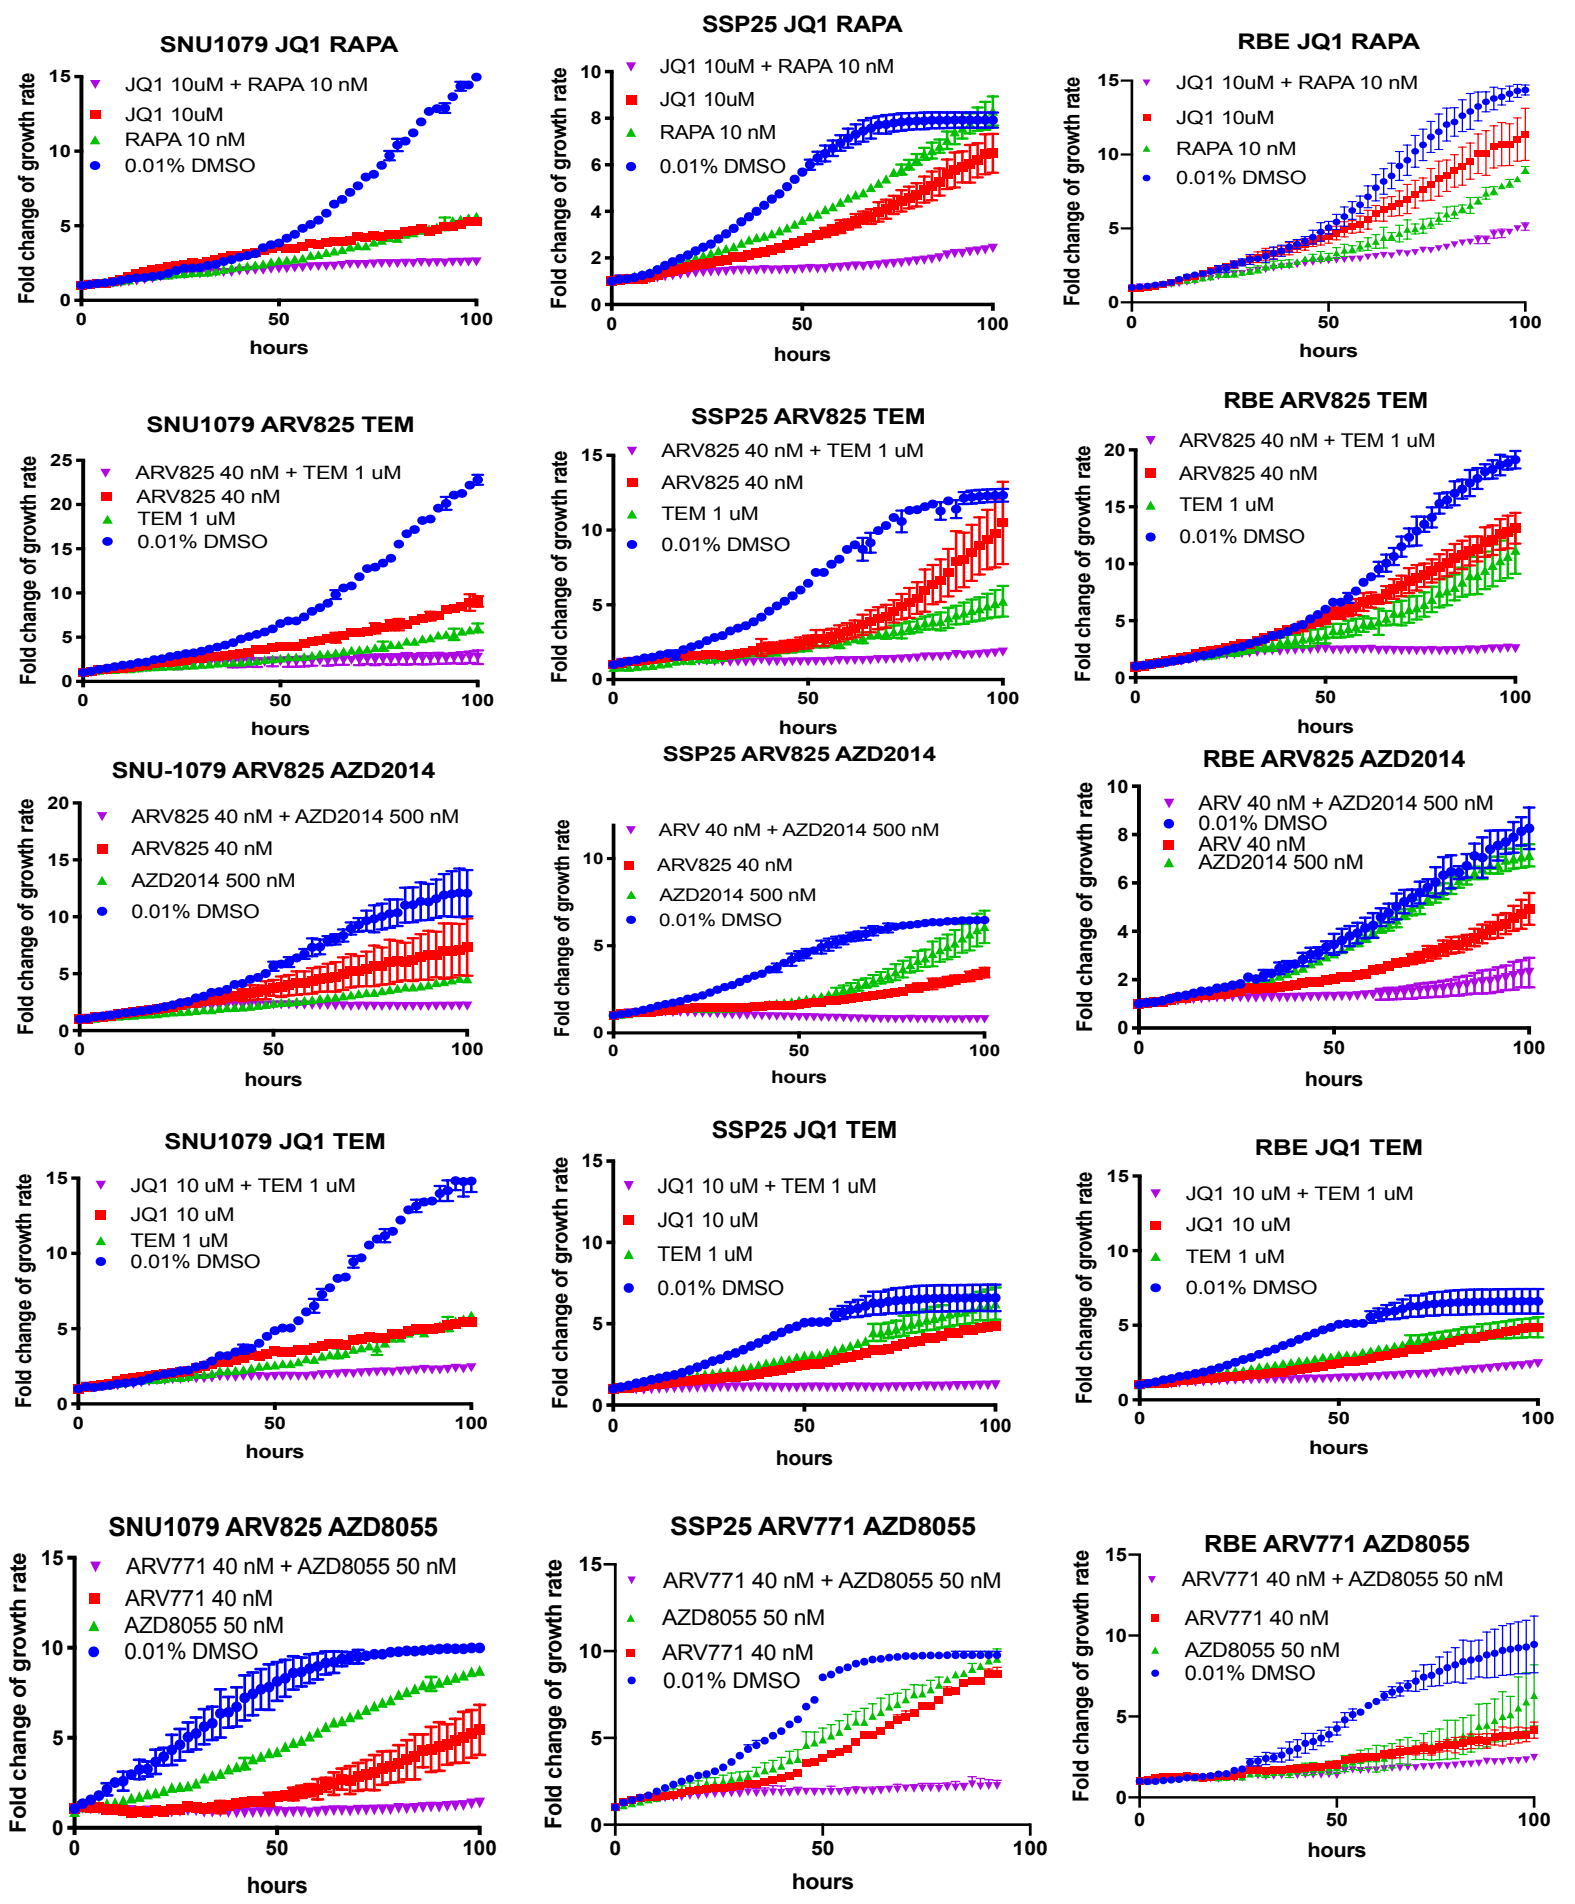

# S Figure3

**SNU1079: RAPA & JQ1**

Mean: 1.4

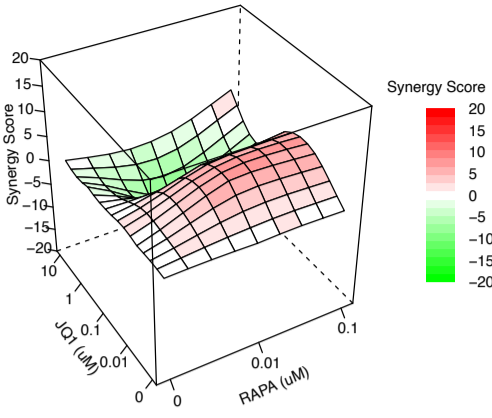

**SSP25: RAPA & JQ1**

Mean: 21.56

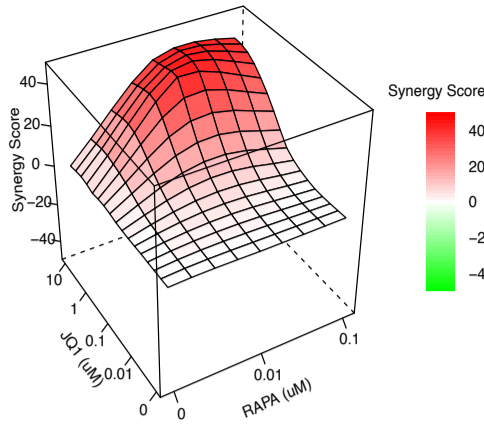

**RBE: RAPA & JQ1**

Mean: 4.31

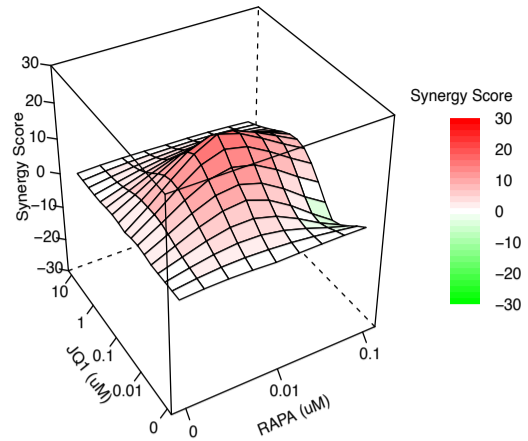

**SNU1079: TEM & ARV825**

Mean: 5.36

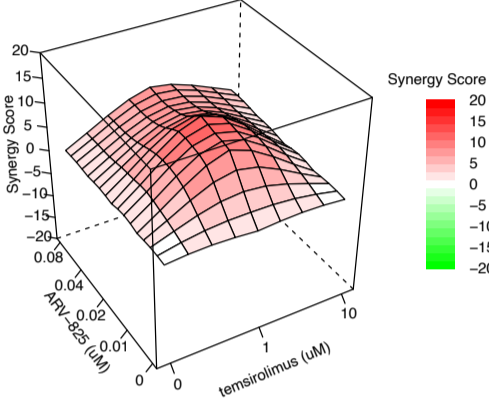

**SSP25: TEM & ARV825**

Mean: 22.51

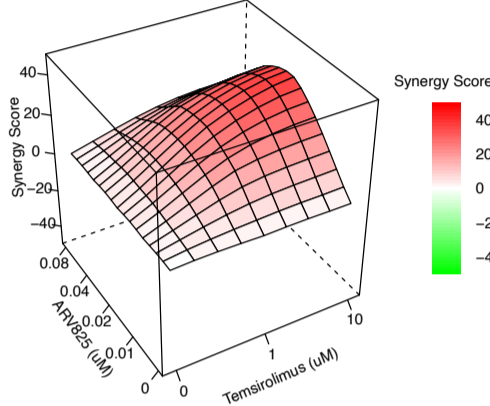

**RBE: TEM & ARV825**

Mean: 19.06

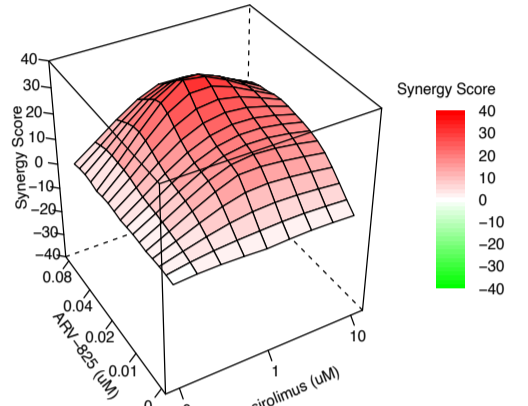

**SNU1079: AZD2014 & ARV825**

Mean: 4.8

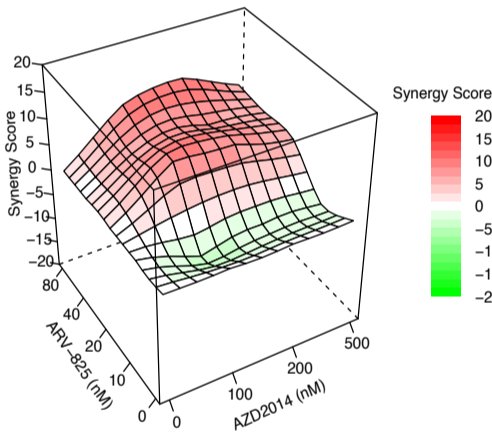

**SSP25: AZD2014 & ARV825**

Mean: 19.06

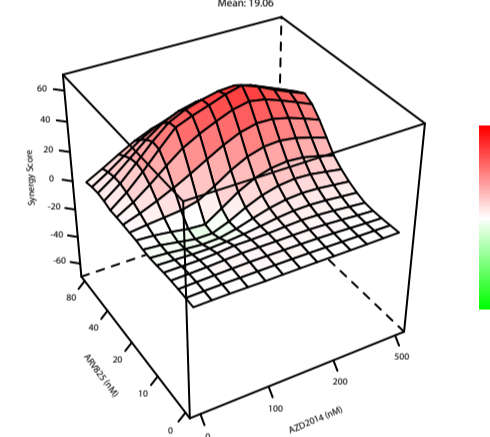

**RBE: ARV825 & AZD2014**

Mean: 5.03

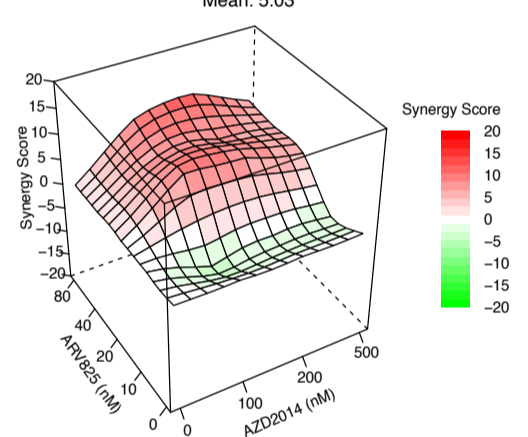

**SNU1079: TEM & JQ1**

Mean: 2.87

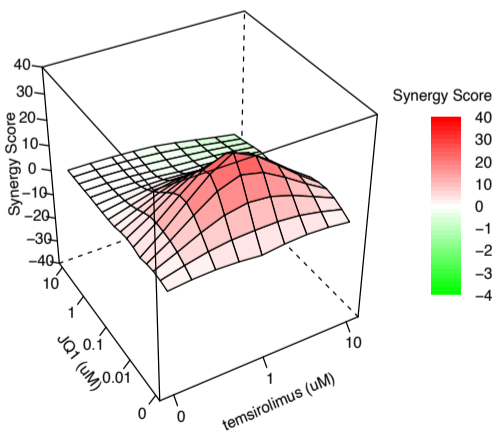

**SSP25: TEM & JQ1**

Mean: 16.58

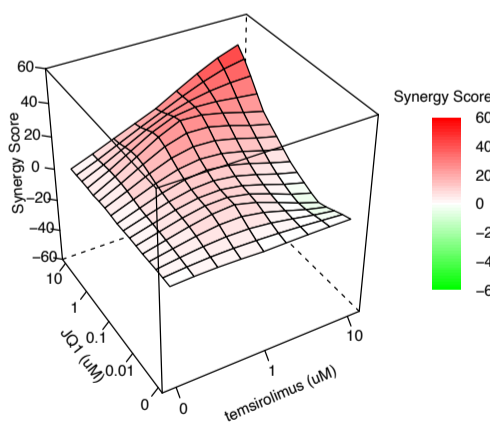

**RBE: TEM & JQ1**

Mean: 16.43

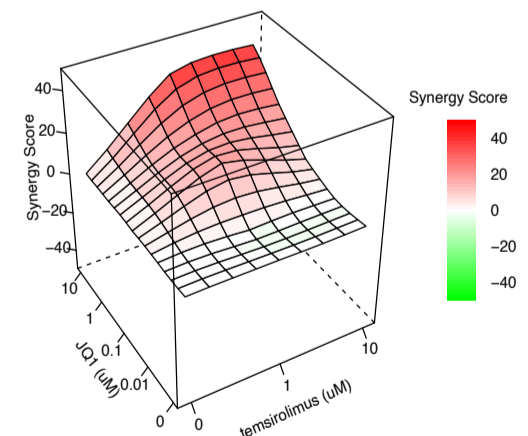

**SUN1079: AZD8055 & ARV771**

Mean: 11.25

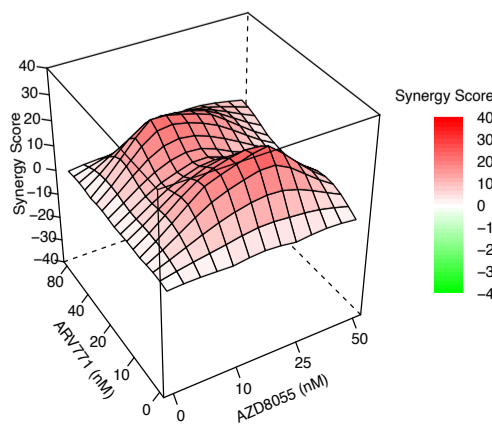

**SSP25: AZD8055 & ARV771**

Mean: 17.45

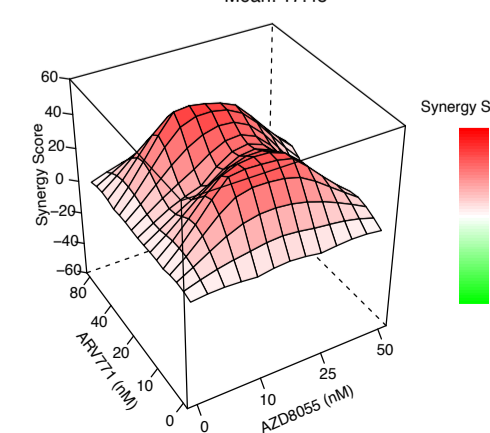

**RBE: AZD8055 & ARV771**

Mean: 4.91

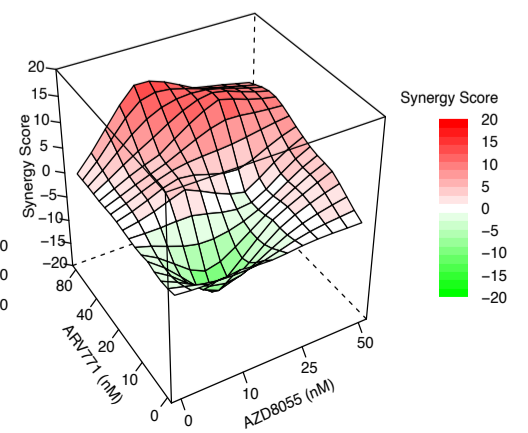

# S Figure4

## A

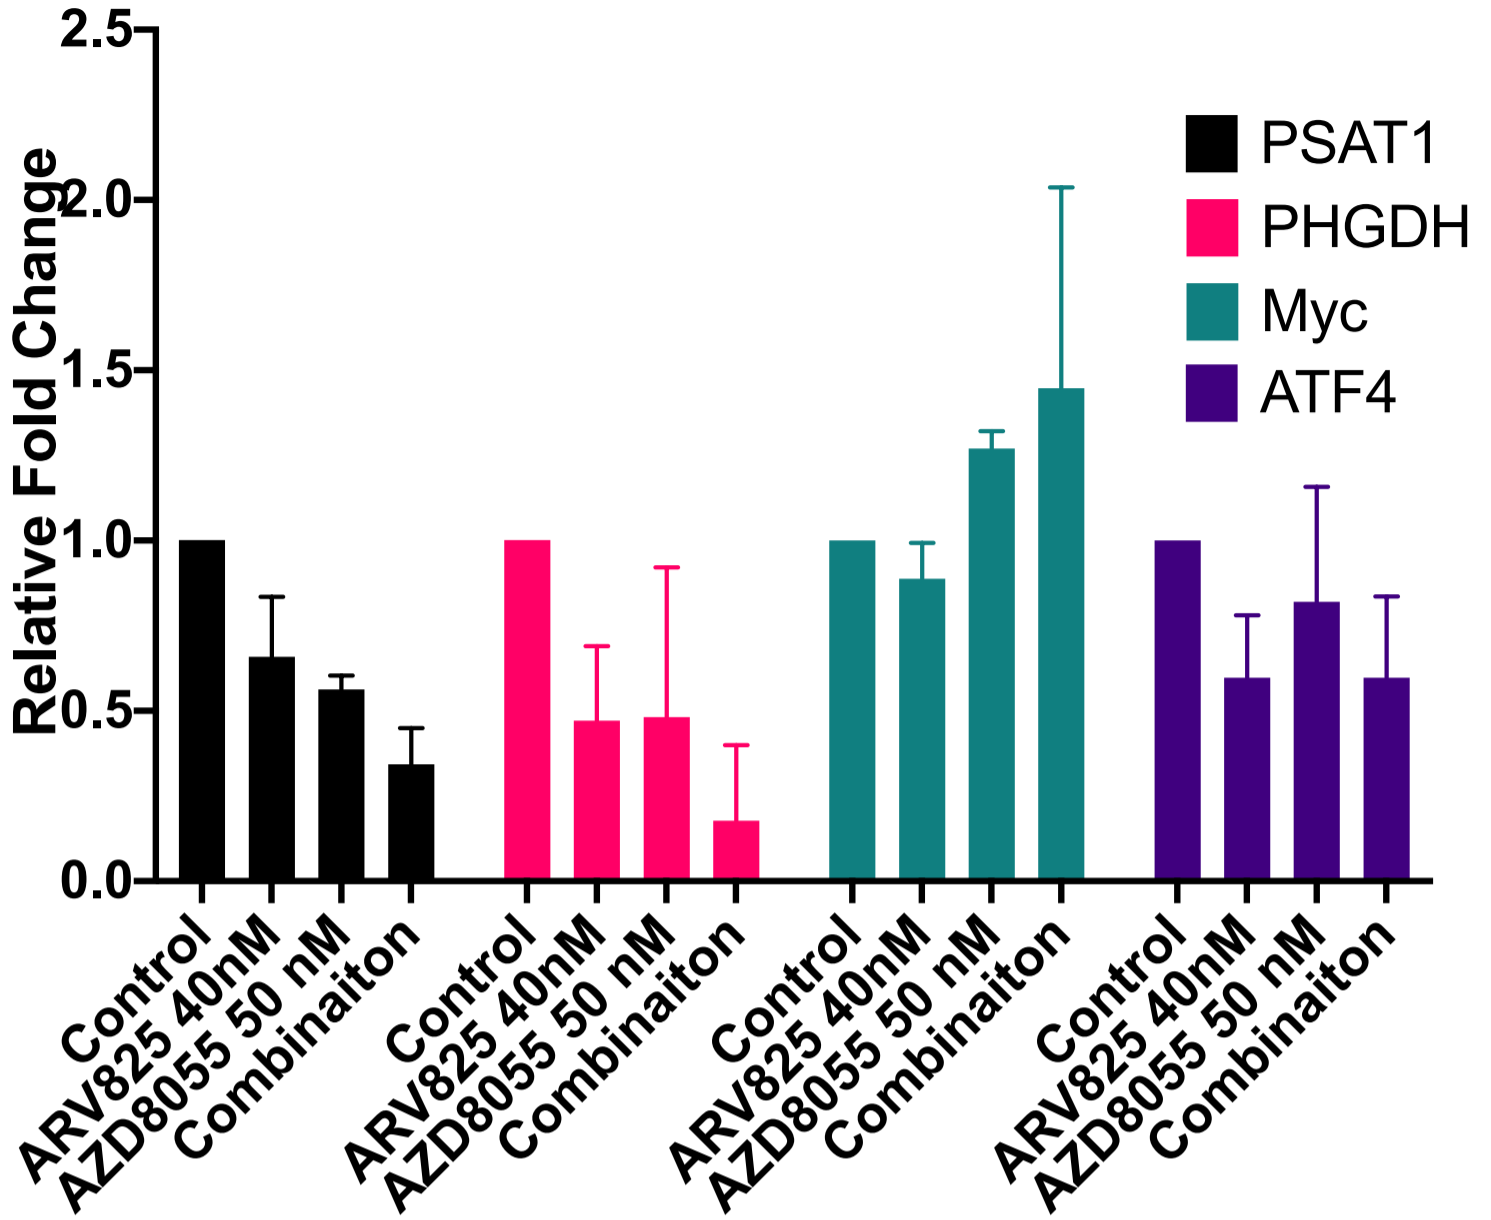

## B

### SNU1079

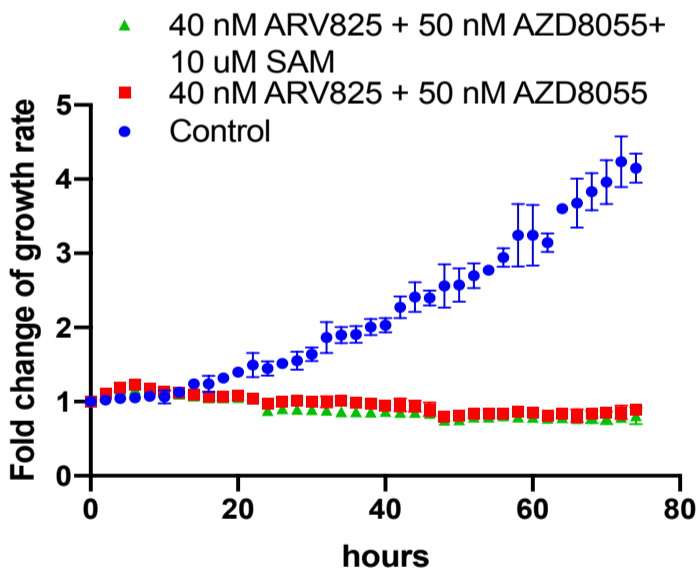

### SSP25

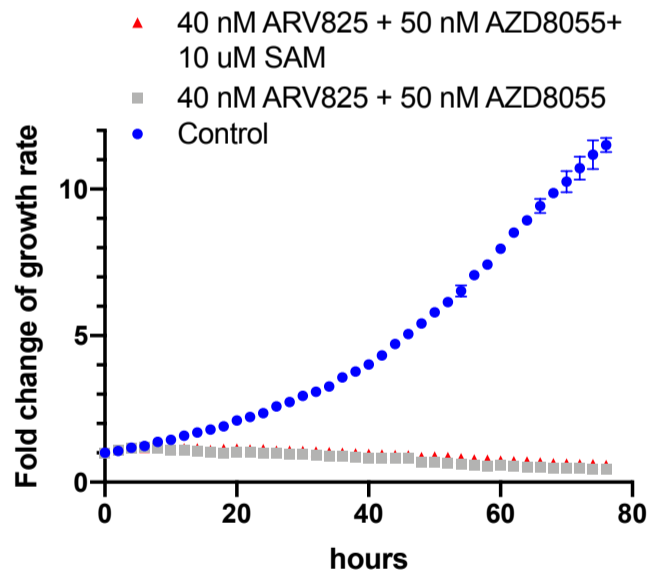

## C

### SNU1079

40 nM ARV825, 50 nM AZD8055,  
0 uM SAM

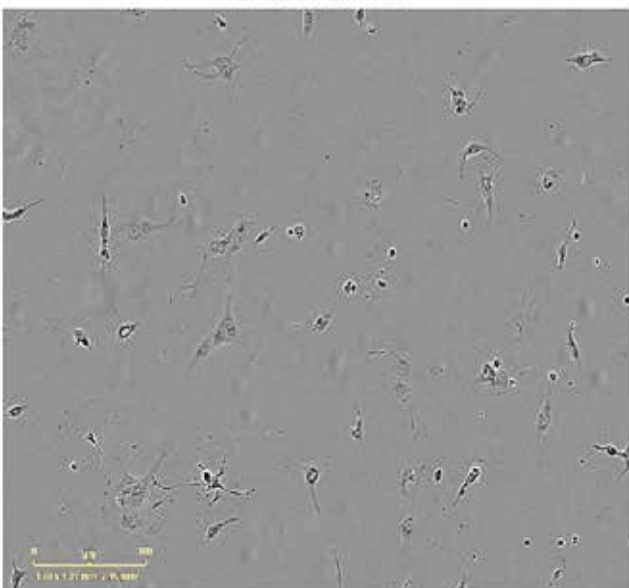

### SNU1079

40 nM ARV825, 50 nM AZD8055,  
100 uM SAM

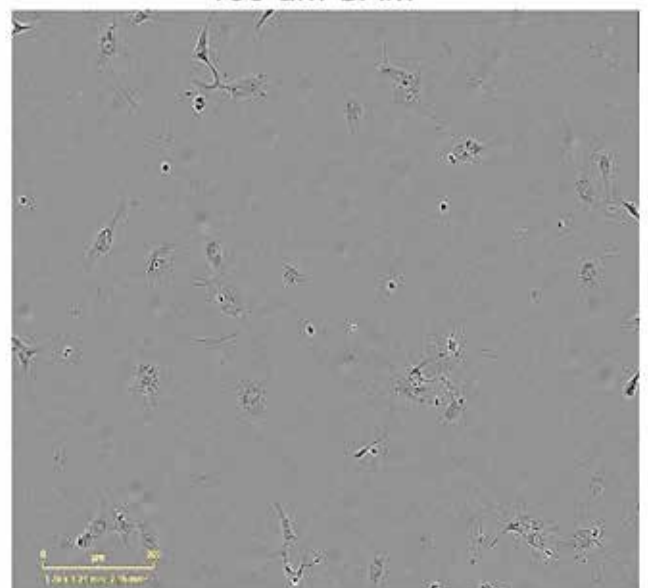

# S Figure 5

## A

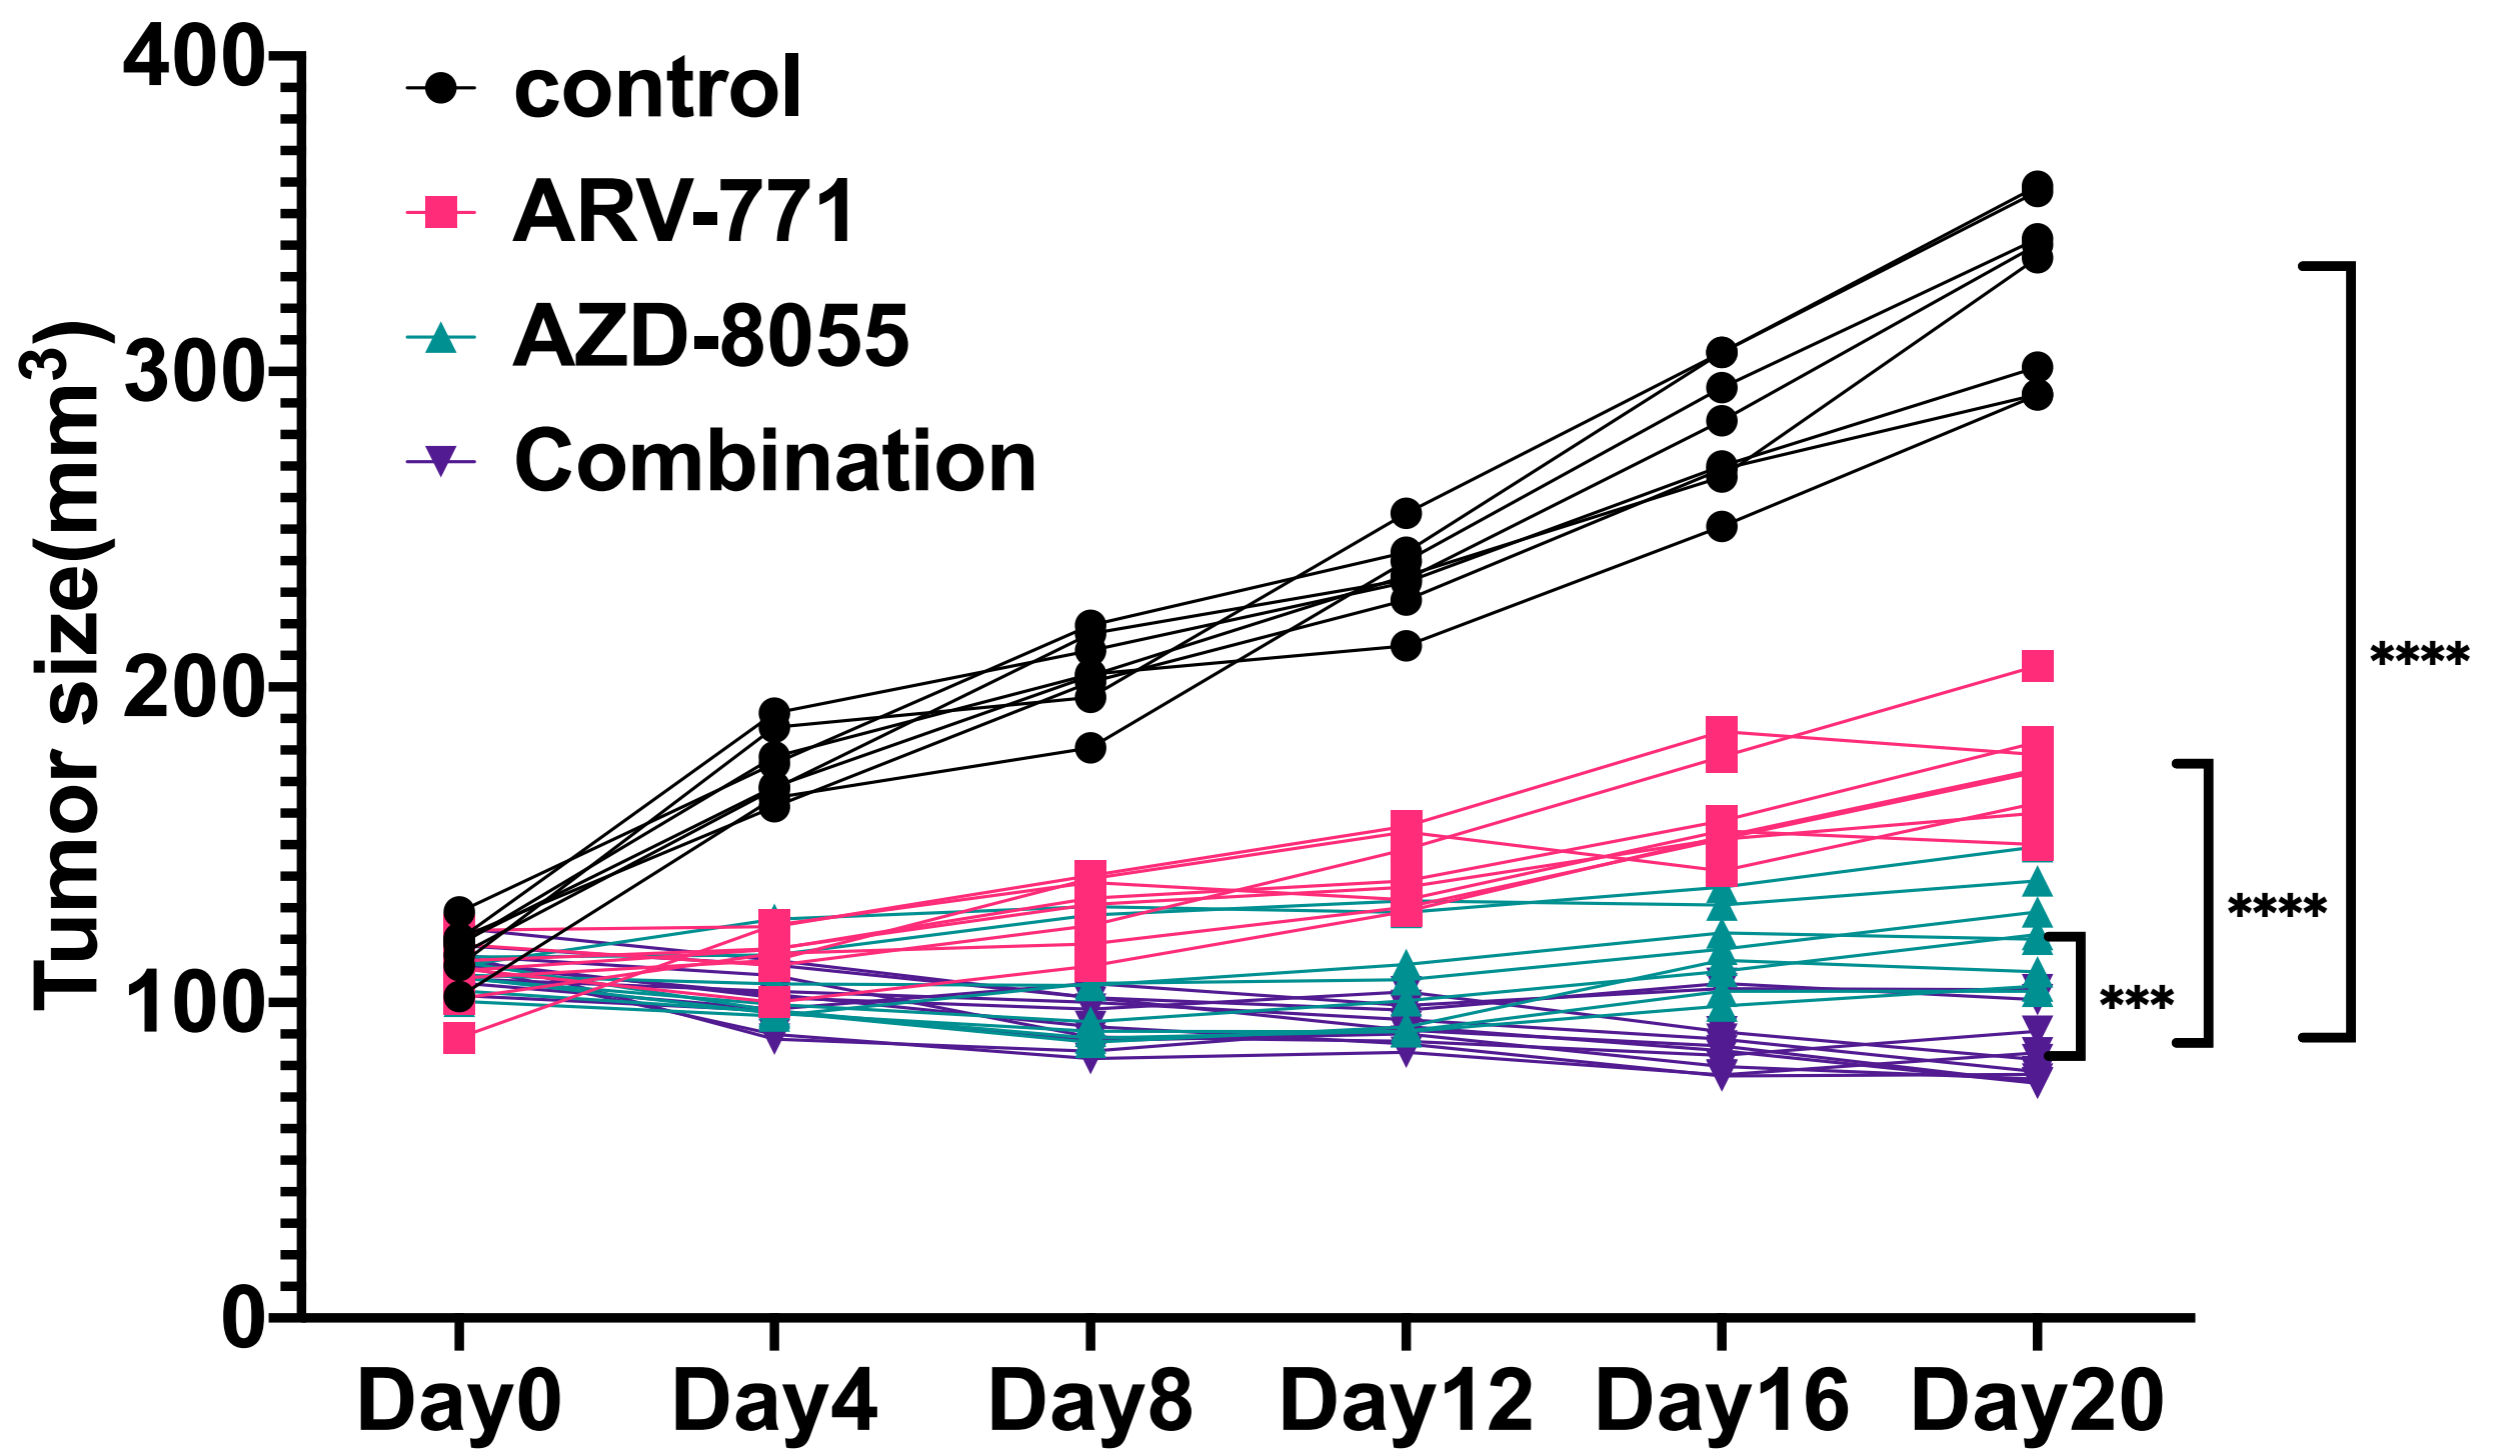

## B

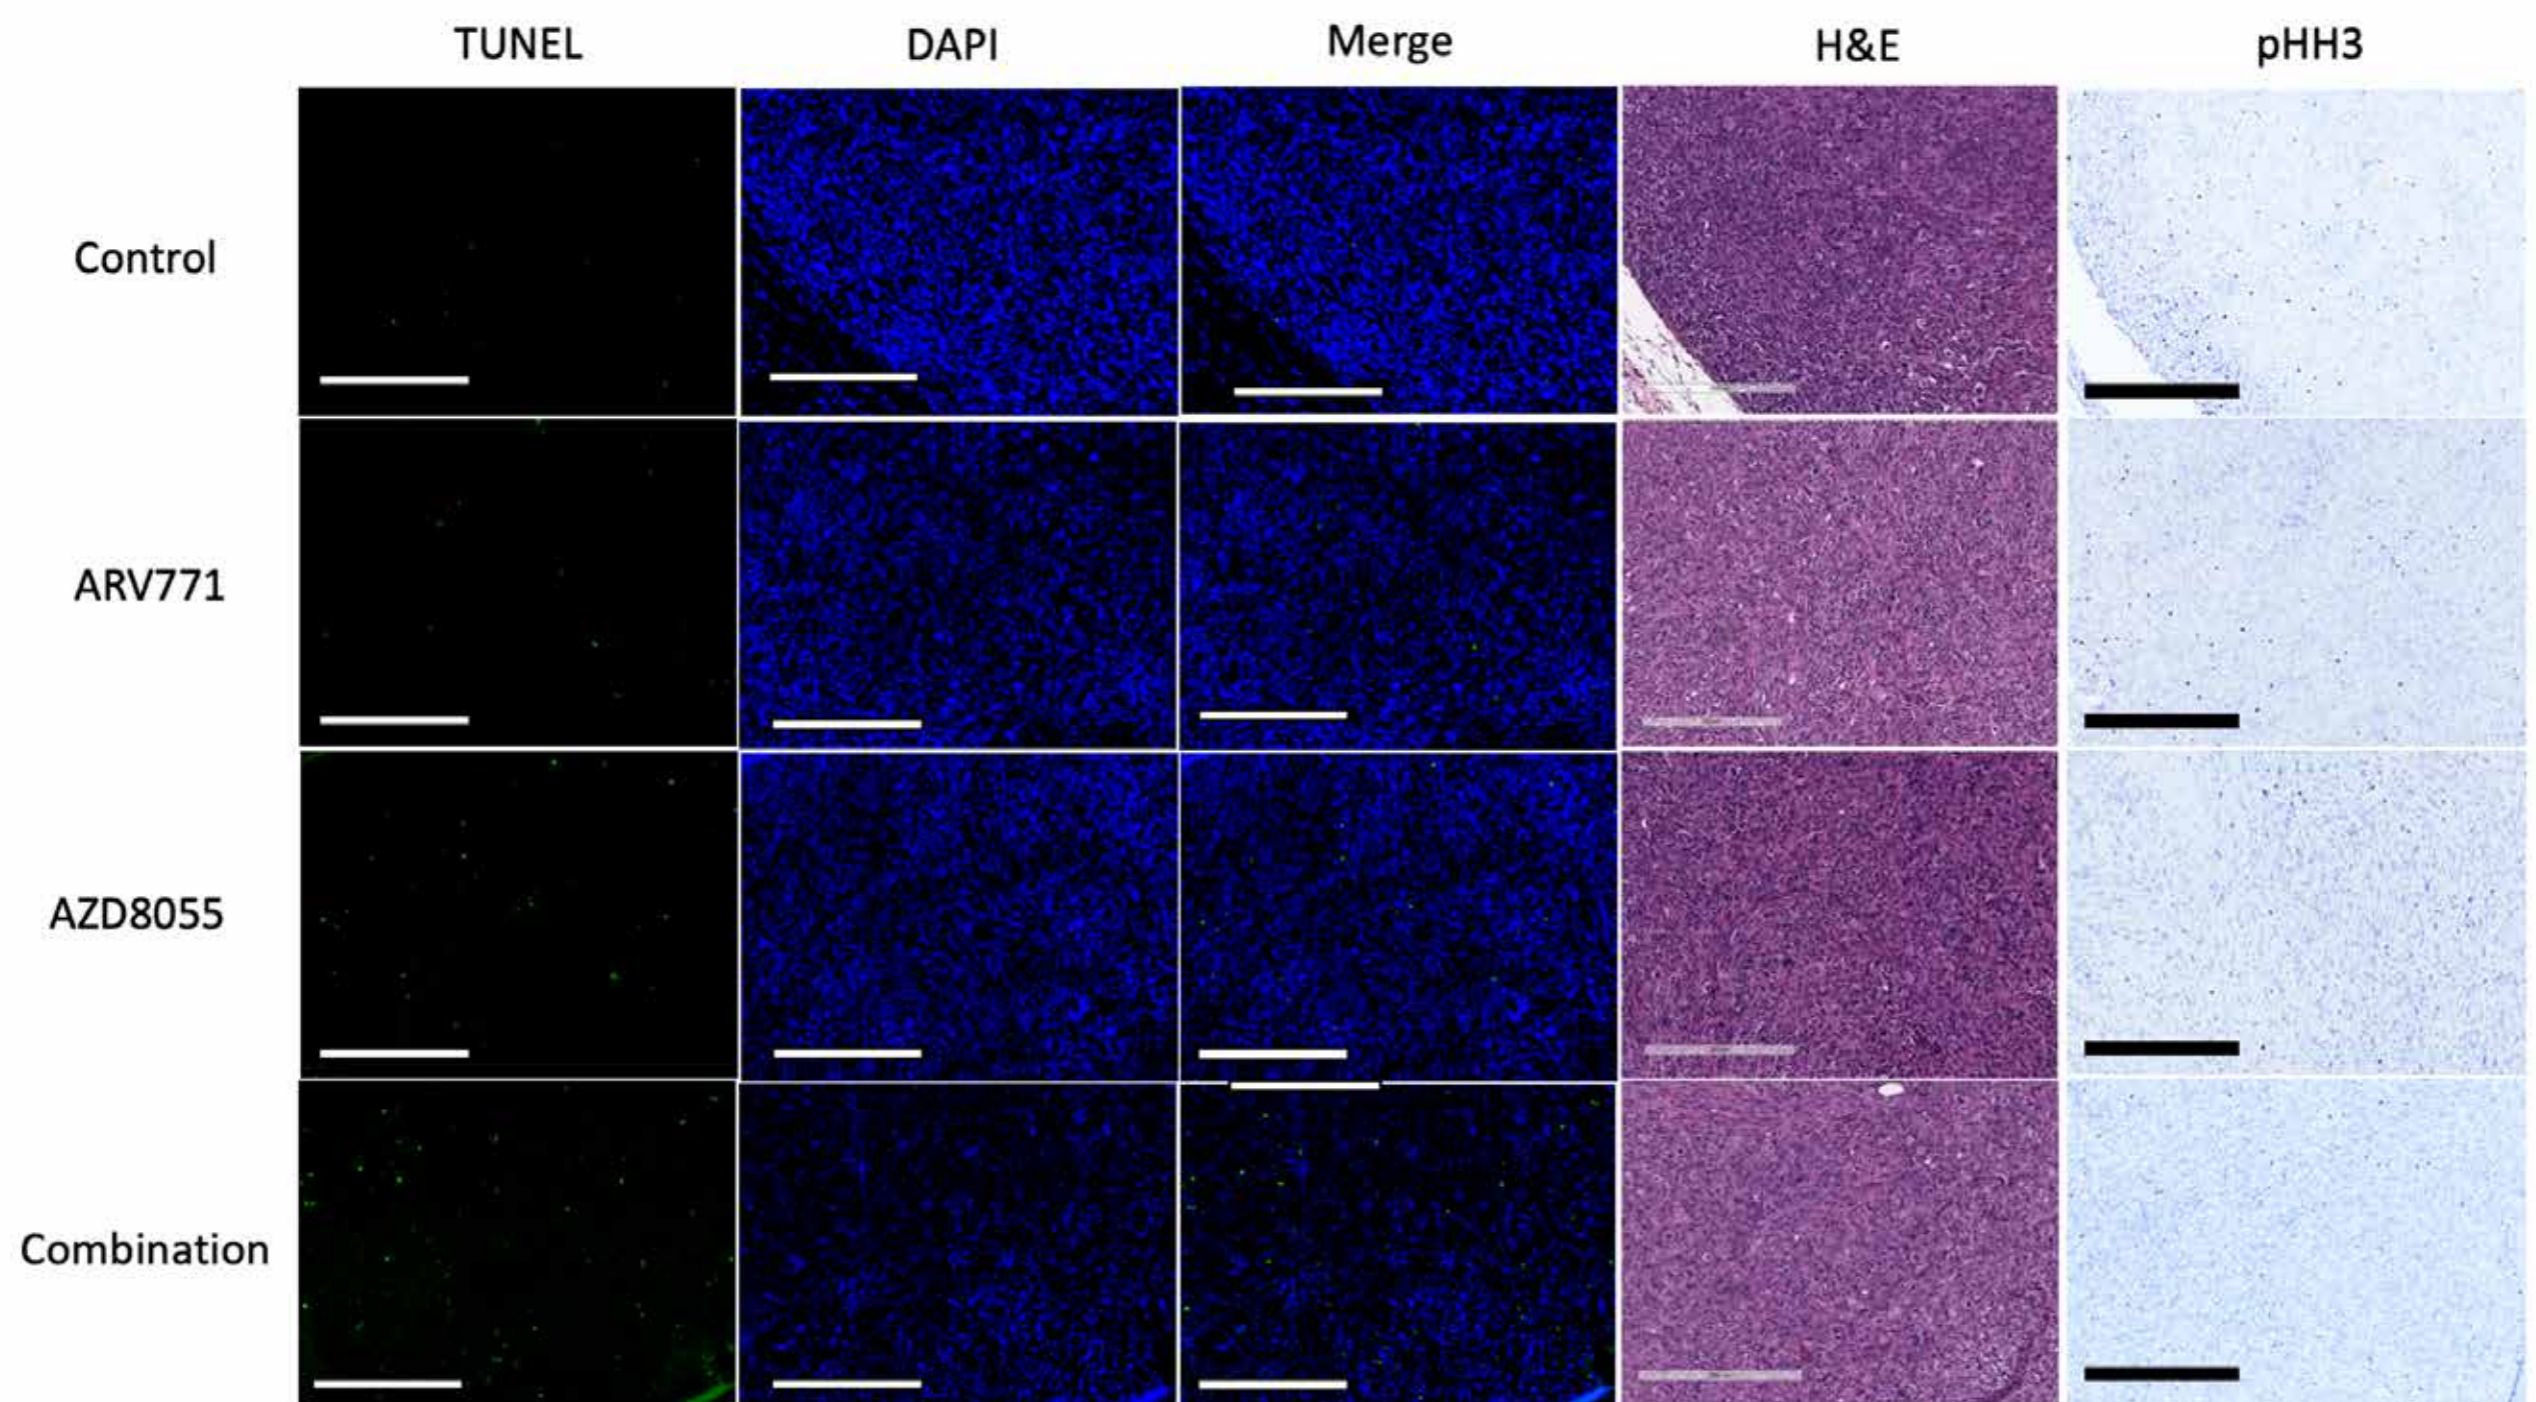

Supplement: sd1 [file 1]
